# Supplementary material
Source: PubMed Central journal article supplement (PMC5388384)
Supplement: supp_the2016-0198_onco12080-sup-0001-suppinfo1.pdf [file supp_the2016-0198_onco12080-sup-0001-suppinfo1.pdf]

Supplemental Appendix for:  
On the Correct Interpretation of the Hazard Ratio and Proper Communication of Survival Benefit  
Andreas Sashegyi et al.

Consider survival distributions for an experimental and a control treatment,  $S_E(x) = \exp(-r\theta x)$  and  $S_C(x) = \exp(-\theta x)$ ,  $x > 0$ , respectively, where  $\theta > 0$  is the hazard rate of the control treatment and  $0 < r < 1$  is the hazard ratio. Applying Taylor series expansions to the right side of Eq. 1 and letting  $p = 1 - r$  yields

$$\begin{aligned} \frac{\exp(-r\theta x) - \exp(-\theta x)}{1 - \exp(-\theta x)} &= \frac{\exp(\theta x[1 - r]) - 1}{\exp(\theta x) - 1} \\ &= \frac{\theta x p + \frac{(\theta x p)^2}{2!} + \frac{(\theta x p)^3}{3!} + \dots}{\theta x + \frac{(\theta x)^2}{2!} + \frac{(\theta x)^3}{3!} + \dots} \\ &= \frac{\theta x p \left[ 1 + \frac{\theta x p}{2!} + \frac{(\theta x p)^2}{3!} + \dots \right]}{\theta x \left[ 1 + \frac{\theta x}{2!} + \frac{(\theta x)^2}{3!} + \dots \right]} \\ &< p = 1 - r. \end{aligned}$$

To determine the point  $x_r$  when relative survival (ratio of control vs experimental arm) equals the hazard ratio, note that  $\frac{\exp(-\theta x_r)}{\exp(-r\theta x_r)} = r$  must be satisfied. Thus

$$\begin{aligned} \theta x_r (1 - r) &= -\log r \\ \therefore x_r &= \frac{1}{\theta} \left( \frac{\log r}{r - 1} \right). \end{aligned}$$

To determine the point of maximal separation of the survival curves, note that this is given by the solution to  $\frac{d}{dx}(\exp(-r\theta x) - \exp(-\theta x)) = 0$ . Thus,

Supplemental Appendix for:  
On the Correct Interpretation of the Hazard Ratio and Proper Communication of Survival Benefit  
Andreas Sashegyi et al.

$$\theta \exp(-\theta x) = r\theta \exp(-r\theta x)$$

$$-\theta x = \log r - r\theta x$$

$$\theta x(r-1) = \log r \quad .$$

$$\therefore x = \frac{1}{\theta} \left( \frac{\log r}{r-1} \right) = x_r$$
